# Supplementary material for: Impact of Turbulence on Aeolian Sand and Dust Entrainment: Results from Wind-tunnel Experiment
Source: Copernicus journal article supplement (doi:10.5194/acp-2022-76), 2022-03-17
Supplement: Supplementary file [file acp-2022-76-AC5-supplement.pdf]

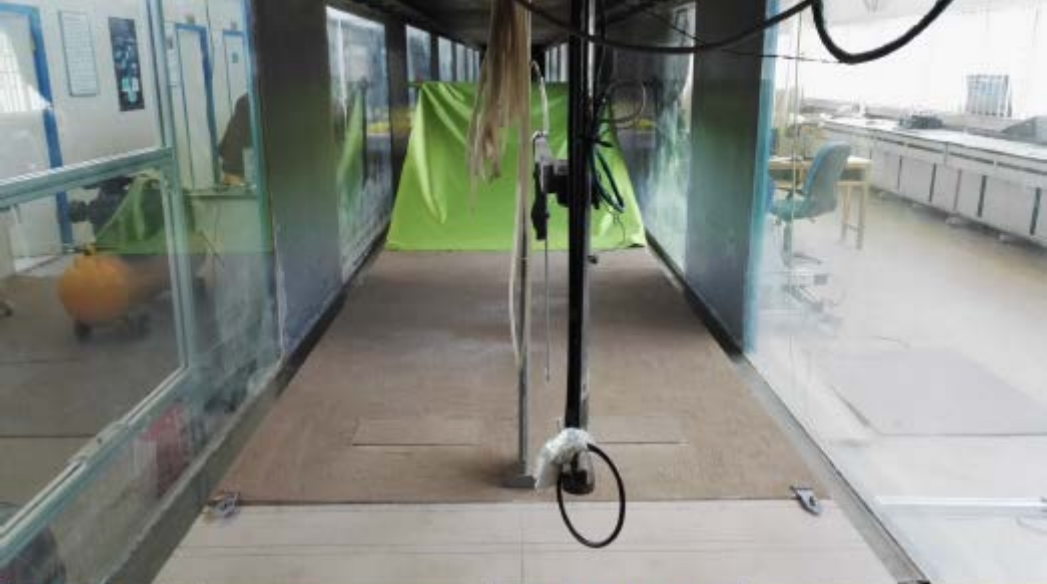

Wind profiler

Expected wind direction

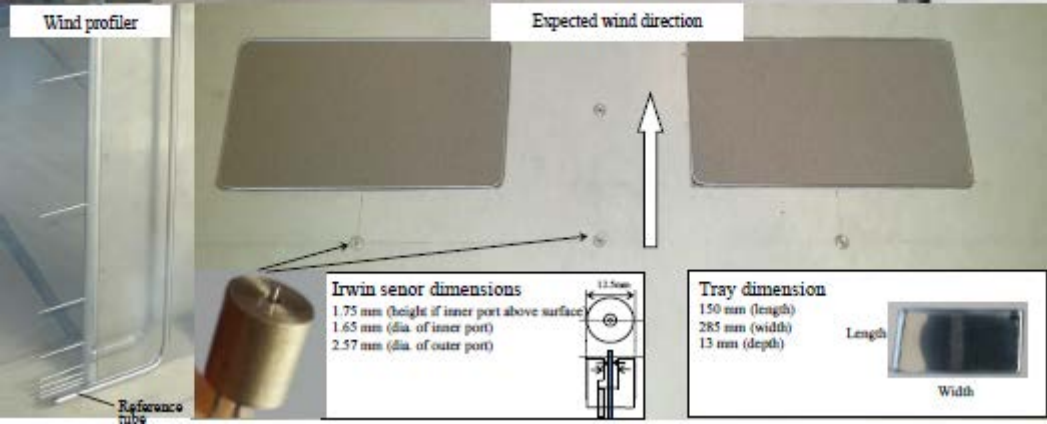

**Irwin sensor dimensions**

- 1.75 mm (height of inner port above surface)
- 1.65 mm (dia. of inner port)
- 2.57 mm (dia. of outer port)

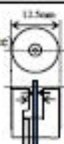

**Tray dimension**

- 150 mm (length)
- 285 mm (width)
- 13 mm (depth)

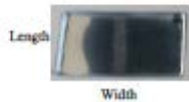

Reference tube
